# Supplementary material for: International ResearchKit App for Women with Menstrual Pain: Development, Access, and Engagement
Source: PubMed Central journal article supplement (PMC7055820; doi:10.2196/14661), 2020-02-11

## When to Apply Acupressure

Apply acupressure throughout the 5 days leading up to your period until the last day of your period, twice a day if possible.

On days where you have pain during your period, we recommend applying acupressure at least twice a day, up to 5 times a day if you like.

## How to Apply Acupressure

First, find a comfortable sitting position. Using your thumb, massage each acupressure point in small circles with medium pressure (firmly, but not so that you injure yourself). Focus on the acupressure point as you are massaging it. Make sure that you use circular movements and do not rub back and forth. While massaging, you should notice a distinct sensation, e.g. tingling, warmth, heaviness or aching. Massage each of the three points one after the other for one minute, on both sides of your body. We suggest to use the timer of the app.

### Spleen 6

- On the inside of your leg
- Four fingers above the highest point of the inner ankle bone
- The acupressure point is in a depression just behind the tibia

### Liver 3

- On the top of the foot
- Move your finger or thumb upwards between your big toe and the second toe
- The acupressure point is in a depression just before the metatarsal bones meet

### Large Intestine 4

- On the back of your hand
- Between the thumb and the metacarpal bone of the index finger
- Large Intestine 4 is at the highest point of the muscle bulge

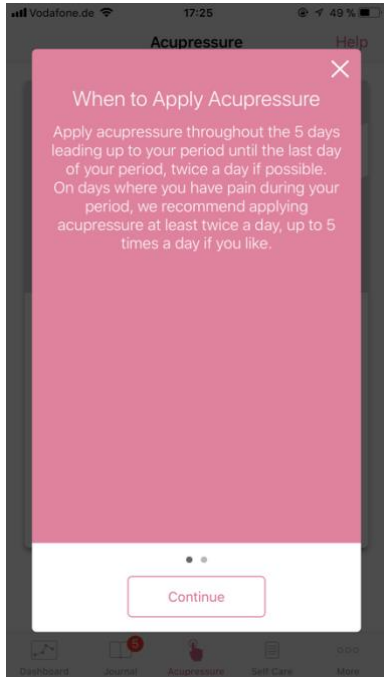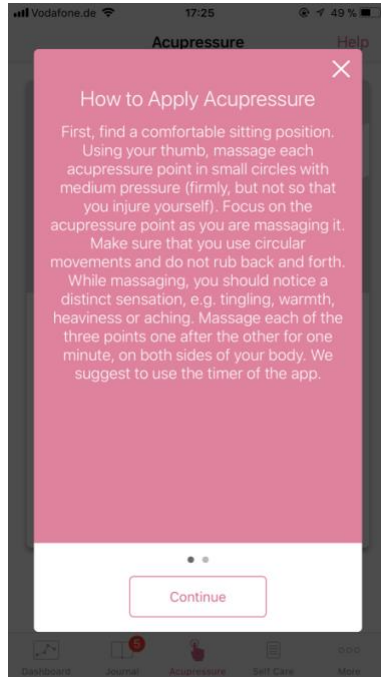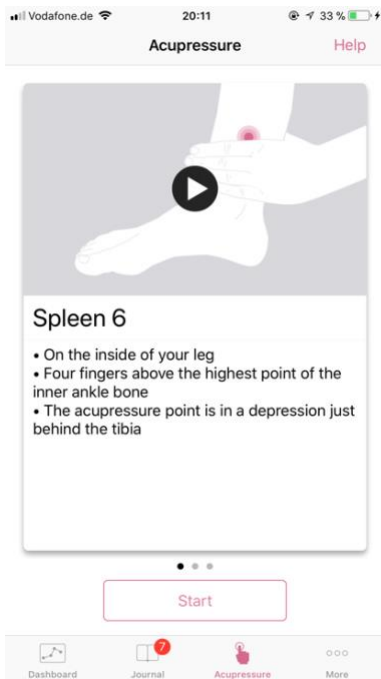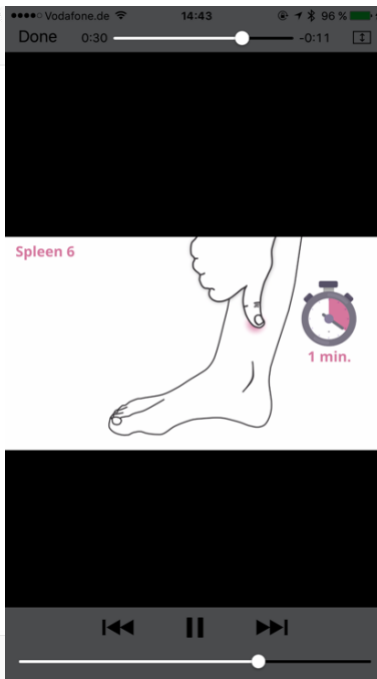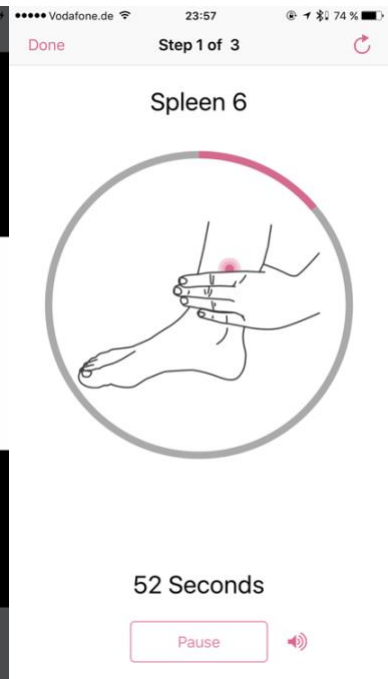

Supplement: mhealth_v8i2e14661_app2.pdf [file mhealth_v8i2e14661_app2.pdf]
