# Supplementary material for: International ResearchKit App for Women with Menstrual Pain: Development, Access, and Engagement
Source: PubMed Central journal article supplement (PMC7055820; doi:10.2196/14661), 2020-02-11

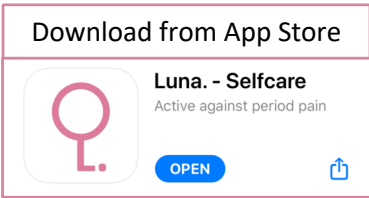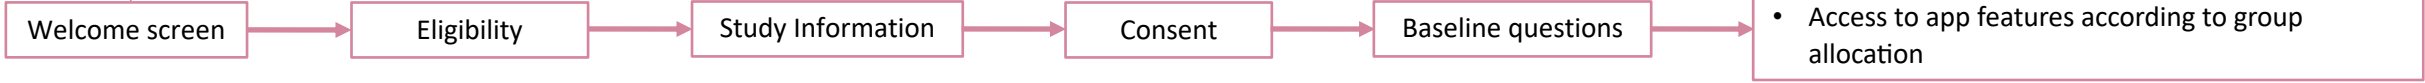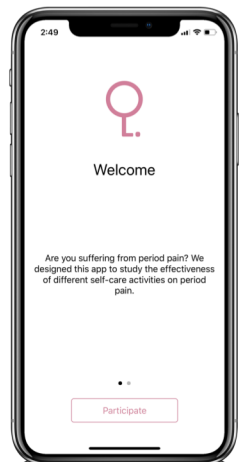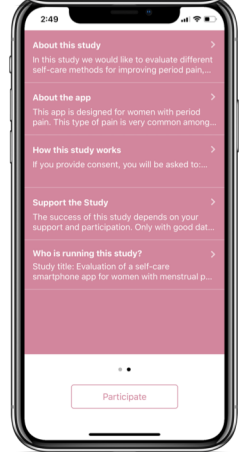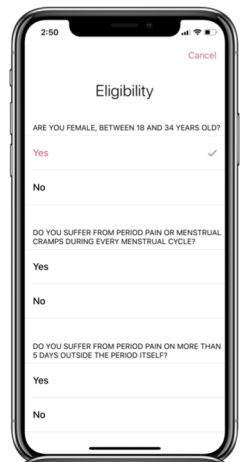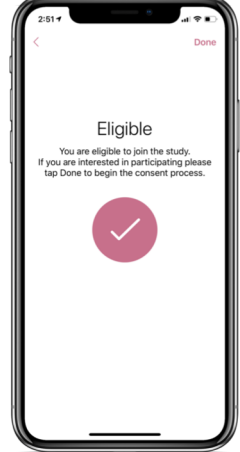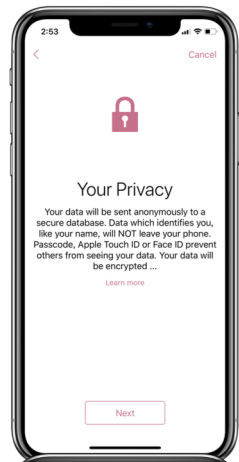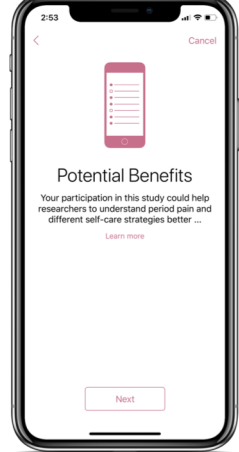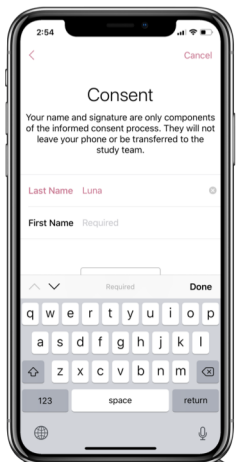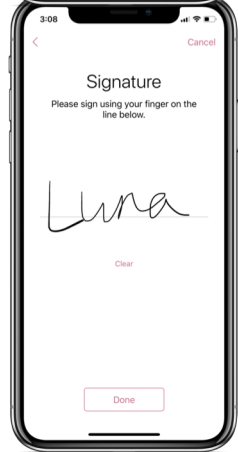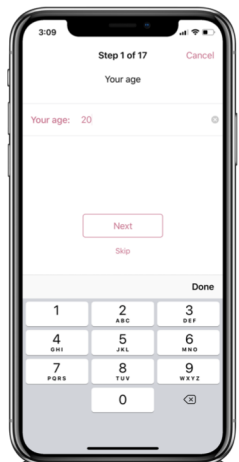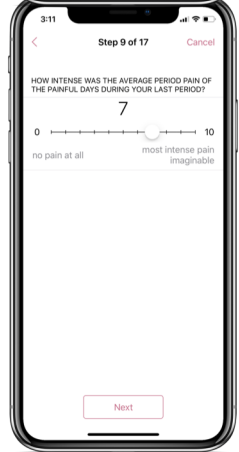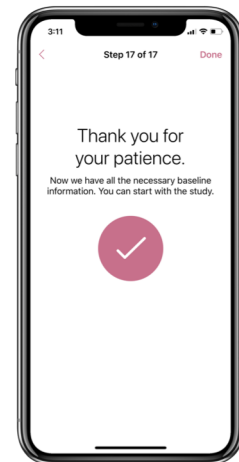

• Access to app features according to group allocation

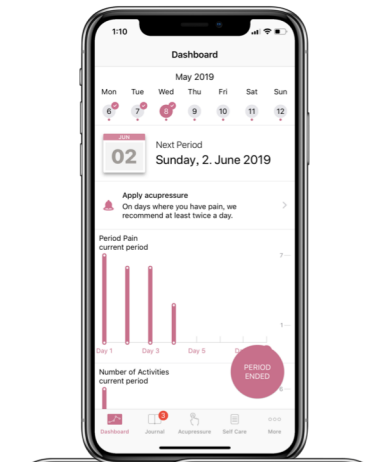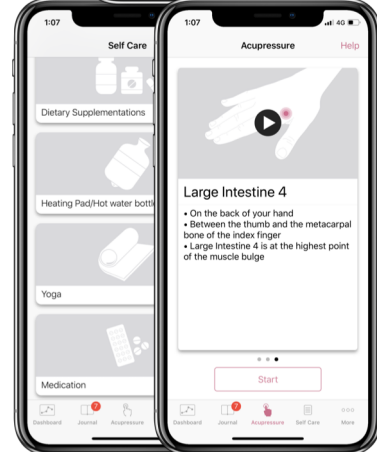

Supplement: mhealth_v8i2e14661_app3.pdf [file mhealth_v8i2e14661_app3.pdf]
